# Supplementary material
Source: PubMed Central journal article supplement (PMC2835323)
Supplement: supp_dev.049437_DEV049437TableS1.pdf [file supp_dev.049437_DEV049437TableS1.pdf]

**Table S1. Genes identified by microarray analysis whose expression was upregulated in response to fluid flow in a *Pkd1* dependent manner**

| <b>Metabolism</b>                          |                                                                                                       |                     |                       |                     |                       |
|--------------------------------------------|-------------------------------------------------------------------------------------------------------|---------------------|-----------------------|---------------------|-----------------------|
| Gene symbol                                | Gene title                                                                                            | Pkd1 <sup>+/+</sup> | Pkd1 <sup>+/+</sup> F | Pkd1 <sup>-/-</sup> | Pkd1 <sup>-/-</sup> F |
| <i>CKb</i>                                 | creatine kinase, brain                                                                                | 2.71                | 5.47                  | 1.03                | 1                     |
| <i>Gda</i>                                 | guanine deaminase                                                                                     | 60.01               | 108.9                 | 1                   | 1.26                  |
| <i>Inpp5a</i>                              | inositol polyphosphate-5-phosphatase A                                                                | 1.03                | 1.65                  | 1.24                | 1                     |
| <i>Nudt6</i>                               | nudix (nucleoside diphosphate linked moiety X)-type motif 6                                           | 3.41                | 10.54                 | 1.71                | 1                     |
| <i>Obfc1</i>                               | oligonucleotide/oligosaccharide-binding fold containing 1                                             | 1.43                | 2.27                  | 1                   | 1.06                  |
| <i>Tiparp</i>                              | TCDD-inducible poly(ADP-ribose) polymerase                                                            | 1.16                | 1.81                  | 1                   | 1.11                  |
| <i>Upp1</i>                                | uridine phosphorylase 1                                                                               | 1                   | 2.05                  | 2.9                 | 2.57                  |
| <i>Acsbg1</i>                              | acyl-CoA synthetase bubblegum family member 1                                                         | 14.44               | 40.41                 | 1                   | 1.26                  |
| <i>Ptgs1</i>                               | prostaglandin-endoperoxide synthase 1                                                                 | 6.12                | 12.02                 | 1.19                | 1                     |
| <i>Mrpl33</i>                              | mitochondrial ribosomal protein L33                                                                   | 1.01                | 1.9                   | 1                   | 1.26                  |
| <i>Txnip</i>                               | thioredoxin interacting protein                                                                       | 1                   | 1.94                  | 1.22                | 1.4                   |
| <i>HK2</i>                                 | hexokinase 2                                                                                          | 1                   | 2.06                  | 1.5                 | 1.19                  |
| <i>Ptgs1</i>                               | prostaglandin-endoperoxide synthase 1                                                                 | 6.12                | 12.02                 | 1.19                | 1                     |
| <i>Fabp4</i>                               | fatty acid binding protein 4, adipocyte                                                               | 4.02                | 22.5                  | 1.1                 | 1                     |
| <i>Mgat5</i>                               | mannoside acetylglucosaminyltransferase 5                                                             | 1                   | 1.56                  | 1.1                 | 1.27                  |
| <i>Acs14</i>                               | acyl-CoA synthetase long-chain family member 4                                                        | 1                   | 1.69                  | 1.81                | 2.1                   |
| <i>St3gal1</i>                             | ST3 beta-galactoside alpha-2,3-sialyltransferase 1                                                    | 1.71                | 2.76                  | 1                   | 1.02                  |
| <b>Cytoskeleton/Transport</b>              |                                                                                                       |                     |                       |                     |                       |
| Gene symbol                                | Gene title                                                                                            | Pkd1 <sup>+/+</sup> | Pkd1 <sup>+/+</sup> F | Pkd1 <sup>-/-</sup> | Pkd1 <sup>-/-</sup> F |
| <i>MIM</i>                                 | missing in metastasis protein                                                                         | 58.11               | 95.56                 | 1.66                | 1                     |
| <i>Baiap2l1</i>                            | BAI1-associated protein 2-like 1                                                                      | 1.13                | 1.96                  | 1.14                | 1                     |
| <i>Nup54</i>                               | nucleoporin 54                                                                                        | 1.11                | 2.29                  | 1.19                | 1                     |
| <i>Sept9</i>                               | septin 9                                                                                              | 1.69                | 2.8                   | 1                   | 1.06                  |
| <i>Fmnl2</i>                               | formin-like 2                                                                                         | 1                   | 1.84                  | 2.05                | 2.63                  |
| <i>Grasp</i>                               | GRP1-associated scaffold protein                                                                      | 1.24                | 2.32                  | 1                   | 1.15                  |
| <i>Mical1</i>                              | microtubule-associated monooxygenase, calponin and LIM domain-containing 1                            | 1                   | 1.87                  | 1.78                | 2.53                  |
| <i>Fgd6</i>                                | FYVE, RhoGEF and PH domain-containing 6                                                               | 1.24                | 2.32                  | 1                   | 1.14                  |
| <i>Psen2</i>                               | presenilin 2                                                                                          | 1.22                | 2.02                  | 1.16                | 1                     |
| <i>Arhgap6</i>                             | Rho GTPase activating protein 6                                                                       | 1.8                 | 5.71                  | 1.23                | 1                     |
| <b>Potential Wnt Signaling</b>             |                                                                                                       |                     |                       |                     |                       |
| Gene symbol                                | Gene title                                                                                            | Pkd1 <sup>+/+</sup> | Pkd1 <sup>+/+</sup> F | Pkd1 <sup>-/-</sup> | Pkd1 <sup>-/-</sup> F |
| <i>LOC2269</i>                             | similar to ALY                                                                                        | 2.59                | 24.31                 | 2.26                | 1                     |
| <i>Tcf23</i>                               | transcription factor 23                                                                               | 4.98                | 13.12                 | 1.07                | 1                     |
| <b>Apoptosis</b>                           |                                                                                                       |                     |                       |                     |                       |
| Gene symbol                                | Gene title                                                                                            | Pkd1 <sup>+/+</sup> | Pkd1 <sup>+/+</sup> F | Pkd1 <sup>-/-</sup> | Pkd1 <sup>-/-</sup> F |
| <i>Bmf</i>                                 | Bcl2 modifying factor                                                                                 | 1.16                | 3.84                  | 1                   | 1.19                  |
| <b>Chromatin/Transcription/RNA-binding</b> |                                                                                                       |                     |                       |                     |                       |
| Gene symbol                                | Gene title                                                                                            | Pkd1 <sup>+/+</sup> | Pkd1 <sup>+/+</sup> F | Pkd1 <sup>-/-</sup> | Pkd1 <sup>-/-</sup> F |
| <i>Fli1</i>                                | Friend leukemia integration 1                                                                         | 113.08              | 174.44                | 1                   | 1.36                  |
| <i>Nr4a1</i>                               | nuclear receptor subfamily 4, group A, member 1                                                       | 1                   | 2.11                  | 1.33                | 1.85                  |
| <i>Prrx1</i>                               | paired related homeobox 1                                                                             | 23.58               | 59.94                 | 1.12                | 1                     |
| <i>Nab1</i>                                | Ngfi-A binding protein 1                                                                              | 1                   | 1.54                  | 1.33                | 1.57                  |
| <i>Arid5b</i>                              | Modulator recognition factor 2(Mrf2)                                                                  | 1                   | 1.68                  | 1.05                | 1.27                  |
| <i>Ddef2</i>                               | development and differentiation enhancing factor 2                                                    | 4.11                | 7.14                  | 1.1                 | 1                     |
| <i>MEF2C</i>                               | myocyte enhancer factor 2C                                                                            | 11.57               | 24.43                 | 1.69                | 1                     |
| <i>GATA6</i>                               | GATA binding protein 6                                                                                | 8.74                | 13.15                 | 1                   | 1.02                  |
| <i>Nova1</i>                               | neuro-oncological ventral antigen 1                                                                   | 17.42               | 36.56                 | 1.89                | 1                     |
| <i>HDAC5</i>                               | histone deacetylase 5                                                                                 | 1.87                | 3.38                  | 1                   | 1.32                  |
| <i>Mllt10</i>                              | Myeloid/lymphoid or mixed lineage-leukemia translocation to 10 homolog ( <i>Drosophila</i> ) (Mllt10) | 1.26                | 2.05                  | 1                   | 1.07                  |
| <i>LOC5462</i>                             | similar to transcription elongation factor B                                                          | 1.65                | 7.09                  | 1                   | 1                     |

|                |                                                                                                         |      |      |      |      |
|----------------|---------------------------------------------------------------------------------------------------------|------|------|------|------|
|                | polypeptide 3 binding protein 1                                                                         |      |      |      |      |
| <i>H1f0</i>    | H1 histone family, member 0                                                                             | 1    | 1.88 | 1.9  | 2.28 |
| <i>H1fx</i>    | H1 histone family, member X                                                                             | 1    | 1.54 | 1.58 | 1.54 |
| <i>Smarcb1</i> | SWI/SNF related, matrix associated, actin dependent regulator of chromatin, subfamily b, member 1, mRNA | 1.24 | 2.61 | 1    | 1.08 |

#### Growth & Differentiation

| Gene symbol   | Gene title                                        | Pkd1 <sup>+/+</sup> | Pkd1 <sup>+/+</sup> F | Pkd1 <sup>-/-</sup> | Pkd1 <sup>-/-</sup> F |
|---------------|---------------------------------------------------|---------------------|-----------------------|---------------------|-----------------------|
| <i>Rasa3</i>  | RAS p21 protein activator 3                       | 1.38                | 2.18                  | 1                   | 1.01                  |
| <i>Slfn2</i>  | schlafen 2                                        | 2.81                | 6.65                  | 1                   | 1.27                  |
| <i>Cul3</i>   | Cullin 3                                          | 1                   | 1.82                  | 1.75                | 2.06                  |
| <i>Trib2</i>  | tribbles homolog 2 ( <i>Drosophila</i> )          | 1                   | 2.9                   | 2.15                | 2.03                  |
| <i>Cxcl1</i>  | chemokine (C-X-C motif) ligand 1                  | 1                   | 1.83                  | 2.97                | 4.24                  |
| <i>Dusp6</i>  | dual specificity phosphatase 6                    | 2.05                | 3.7                   | 1.08                | 1                     |
| <i>Fbxo2</i>  | F-box only protein 2                              | 2                   | 3.05                  | 1                   | 1.18                  |
| <i>Igfbp4</i> | insulin-like growth factor binding protein 4      | 82.19               | 163.87                | 2.17                | 1                     |
| <i>Prkg2</i>  | Protein kinase, cGMP-dependent, type II (Prkg2)   | 3.41                | 8.35                  | 1                   | 1.5                   |
| <i>Adcy7</i>  | adenylate cyclase 7                               | 5.94                | 12.38                 | 1                   | 1.37                  |
| <i>Ndrp2</i>  | N-myc downstream regulated gene 2                 | 8.9                 | 28.86                 | 1.62                | 1                     |
| <i>Mmd</i>    | monocyte to macrophage differentiation-associated | 1.91                | 4.69                  | 1                   | 1.2                   |
| <i>Amhr2</i>  | anti-Mullerian hormone type 2 receptor            | 1                   | 3.26                  | 1.35                | 1.31                  |
| <i>Spry2</i>  | sprouty homolog 2 ( <i>Drosophila</i> )           | 1.96                | 3.43                  | 1                   | 1.07                  |

#### Ion Channels

| Gene symbol   | Gene title                                             | Pkd1 <sup>+/+</sup> | Pkd1 <sup>+/+</sup> F | Pkd1 <sup>-/-</sup> | Pkd1 <sup>-/-</sup> F |
|---------------|--------------------------------------------------------|---------------------|-----------------------|---------------------|-----------------------|
| <i>Slc4a4</i> | solute carrier family 4 (anion exchanger), member 4    | 4.36                | 8.43                  | 1.35                | 1                     |
| <i>Kcnh2</i>  | potassium voltage-gated channel, subfamily H, member 2 | 1                   | 2.19                  | 1.13                | 1.32                  |

#### TGF-beta Signaling

| Gene symbol   | Gene title                                                                  | Pkd1 <sup>+/+</sup> | Pkd1 <sup>+/+</sup> F | Pkd1 <sup>-/-</sup> | Pkd1 <sup>-/-</sup> F |
|---------------|-----------------------------------------------------------------------------|---------------------|-----------------------|---------------------|-----------------------|
| <i>Ltbp1</i>  | latent transforming growth factor beta binding protein 1                    | 2.28                | 4.29                  | 1.09                | 1                     |
| <i>Nrn1</i>   | neuritin 1                                                                  | 9.09                | 17.11                 | 1.82                | 1                     |
| <i>Bambi</i>  | BMP and activin membrane-bound inhibitor, homolog ( <i>Xenopus laevis</i> ) | 7.39                | 15.02                 | 1.74                | 1                     |
| <i>Htra3</i>  | HtrA serine peptidase 3                                                     | 8.16                | 13.46                 | 1                   | 1.22                  |
| <i>Chst11</i> | carbohydrate sulfotransferase 11                                            | 4.88                | 8.21                  | 1.09                | 1                     |

#### G-protein Signaling

| Gene symbol | Gene title                         | Pkd1 <sup>+/+</sup> | Pkd1 <sup>+/+</sup> F | Pkd1 <sup>-/-</sup> | Pkd1 <sup>-/-</sup> F |
|-------------|------------------------------------|---------------------|-----------------------|---------------------|-----------------------|
| <i>Rgs3</i> | regulator of G-protein signaling 3 | 1.14                | 2.72                  | 1.53                | 1                     |

#### Cell-Cell or Cell-Matrix Interaction

| Gene symbol    | Gene title                                                   | Pkd1 <sup>+/+</sup> | Pkd1 <sup>+/+</sup> F | Pkd1 <sup>-/-</sup> | Pkd1 <sup>-/-</sup> F |
|----------------|--------------------------------------------------------------|---------------------|-----------------------|---------------------|-----------------------|
| <i>Clec1a</i>  | C-type lectin domain family 1, member a                      | 8.28                | 27.41                 | 2.92                | 1                     |
| <i>Itga7</i>   | integrin alpha 7                                             | 15.68               | 37.99                 | 1.65                | 1                     |
| <i>Mgp</i>     | matrix Gla protein                                           | 1                   | 9.91                  | 1.56                | 1.27                  |
| <i>Vcam1</i>   | vascular cell adhesion molecule 1                            | 15.26               | 28.99                 | 1.32                | 1                     |
| <i>Mmp13</i>   | matrix metalloproteinase 13                                  | 12.48               | 34.27                 | 1                   | 1.47                  |
| <i>Emp2</i>    | epithelial membrane protein 2                                | 1                   | 2.21                  | 1.17                | 1.25                  |
| <i>Itga10</i>  | integrin, alpha 10 / similar to integrin, alpha 10 precursor | 2.42                | 5.47                  | 1.09                | 1                     |
| <i>Tm4sf1</i>  | transmembrane 4 superfamily member 1                         | 10.31               | 17.21                 | 1                   | 1.46                  |
| <i>Itgb2</i>   | integrin beta 2                                              | 13.28               | 29.11                 | 1.39                | 1                     |
| <i>Tspan32</i> | tetraspanin 32                                               | 6.33                | 12.35                 | 1                   | 1.43                  |

## Unknown/others

| Gene symbol         | Gene title                                                                                                       | Pkd1 <sup>+/+</sup> | Pkd1 <sup>+/+</sup> F | Pkd1 <sup>-/-</sup> | Pkd1 <sup>-/-</sup> F |
|---------------------|------------------------------------------------------------------------------------------------------------------|---------------------|-----------------------|---------------------|-----------------------|
| <i>Cmklr1</i>       | RIKEN cDNA 8430438D04 gene                                                                                       | 12.4                | 37.11                 | 1                   | 1.44                  |
| <i>8430438D</i>     | RIKEN cDNA 8430438D04 gene                                                                                       | 5.78                | 17.9                  | 1                   | 1.32                  |
| <i>D630035</i>      | RIKEN cDNA D630035O19 gene                                                                                       | 3.79                | 7.3                   | 1                   | 1.33                  |
| <i>Spint1</i>       | serine protease inhibitor, Kunitz type 1                                                                         | 8.59                | 19.79                 | 1.43                | 1                     |
| <i>Abca13</i>       | ATP-binding cassette, sub-family A (ABC1), member 13                                                             | 17.85               | 137.03                | 1.52                | 1                     |
| <i>D14Erttd6</i>    | troponin T2, cardiac                                                                                             | 7.31                | 21.19                 | 1                   | 1.04                  |
| <i>2610027C</i>     | RIKEN cDNA 2610027C15 gene                                                                                       | 1                   | 2.12                  | 1.28                | 1.4                   |
| <i>Antxr2</i>       | anthrax toxin receptor 2                                                                                         | 1                   | 1.77                  | 1.51                | 1.41                  |
| <i>AI447904</i>     | expressed sequence AI447904                                                                                      | 1.64                | 7.03                  | 2.09                | 1                     |
| <i>1810023F</i>     | RIKEN cDNA 1810023F06 gene                                                                                       | 7.53                | 16.74                 | 1.12                | 1                     |
| <i>C030045D</i>     | RIKEN cDNA C030045D06 gene                                                                                       | 35.4                | 61.44                 | 1.16                | 1                     |
| <i>Ifi203</i>       | interferon activated gene 203 / similar to interferon-inducible protein 203                                      | 16.61               | 39.09                 | 1                   | 1.22                  |
| <i>LOC5455</i>      | similar to RIKEN cDNA B230218L05 gene                                                                            | 1.82                | 3.62                  | 1.03                | 1                     |
| <i>C3ar1</i>        | complement component 3a receptor 1                                                                               | 5.28                | 9.75                  | 1.09                | 1                     |
| <i>Ly6e</i>         | lymphocyte antigen 6 complex, locus E                                                                            | 1                   | 2.35                  | 1.72                | 2.23                  |
| <i>BC037704</i>     | cDNA sequence BC037704                                                                                           | 2.96                | 6.74                  | 1                   | 1.23                  |
| <i>18100110</i>     | RIKEN cDNA 1810011O10 gene                                                                                       | 1.21                | 5.11                  | 1.1                 | 1                     |
| <i>BCO Loc25600</i> | tribbles homolog 2 (Drosophila)                                                                                  | 47.47               | 79.02                 | 1.6                 | 1                     |
| <i>1110019c</i>     | RIKEN cDNA 1110019C06 gene                                                                                       | 6.42                | 33.35                 | 1                   | 1.38                  |
| <i>D8Erttd82</i>    | DNA segment, Chr 8, ERATO Doi 82, expressed                                                                      | 3.24                | 5.44                  | 1                   | 1.12                  |
| <i>Au020206</i>     | expressed sequence AU020206                                                                                      | 2.02                | 3.06                  | 1.06                | 1                     |
| <i>Raet1a</i>       | retinoic acid early transcript 1, alpha                                                                          | 2.59                | 3.9                   | 1.02                | 1                     |
| <i>Ifnz</i>         | interferon zeta                                                                                                  | 3.25                | 6.45                  | 1                   | 1.42                  |
| <i>Ifi27</i>        | interferon, alpha-inducible protein 27                                                                           | 120.77              | 258.26                | 1.07                | 1                     |
| <i>BC022765</i>     | cDNA sequence BC022765                                                                                           | 2.65                | 4.17                  | 1.05                | 1                     |
| <i>Isg20</i>        | interferon-stimulated protein                                                                                    | 2.3                 | 3.67                  | 1                   | 1.17                  |
| <i>C630004H</i>     | RIKEN cDNA C630004H02 gene                                                                                       | 3.71                | 5.73                  | 1                   | 1.17                  |
| <i>Glcci1</i>       | Glucocorticoid induced transcript 1 (Glcci1), transcript variant 1, mRNA                                         | 1.33                | 2.57                  | 1                   | 1.13                  |
| <i>Scyl1bp1</i>     | SCY1-like 1 binding protein 1                                                                                    | 1.02                | 1.57                  | 1                   | 1.27                  |
| <i>SepW1</i>        | selenoprotein W, muscle 1                                                                                        | 1.02                | 1.56                  | 1                   | 1.3                   |
| <i>4930539P</i>     | RIKEN cDNA 4930539P14 gene                                                                                       | 1                   | 1.64                  | 1.65                | 1.26                  |
| <i>MGI:1930</i>     | brain protein 17                                                                                                 | 3.81                | 5.97                  | 1                   | 1.08                  |
| <i>GM253</i>        | CD300 antigen like family member B (Cd300lb), mRNA                                                               | 1.31                | 5.02                  | 1.65                | 1                     |
| <i>Tcra</i>         | T-cell receptor alpha chain / RIKEN cDNA A430107P09 gene                                                         | 3.2                 | 5.04                  | 1.4                 | 1                     |
| <i>Spp1</i>         | secreted phosphoprotein 1                                                                                        | 1                   | 4.94                  | 3.47                | 4.35                  |
| <i>Hmgb2</i>        | High mobility group box 2, mRNA (cDNA clone MGC:6061 IMAGE:3489780)                                              | 1                   | 1.64                  | 1.93                | 2.54                  |
| <i>290034</i>       | RIKEN cDNA 2900034E22 gene                                                                                       | 1                   | 1.53                  | 1.12                | 1.47                  |
| <i>LOC433777</i>    | similar to Hypothetical protein DJ1198H6.2 /similar to Hypothetical protein DJ1198H6.2 / similar to Hypothetical | 20.83               | 127.4                 | 1.68                | 1                     |
| <i>2610203C20</i>   | RIKEN cDNA 2610203C20 gene                                                                                       | 1.18                | 2.41                  | 1                   | 1.33                  |
| <i>AI467606</i>     | expressed sequence AI467606                                                                                      | 1.85                | 5.41                  | 1                   | 1.21                  |
| <i>C030034I22</i>   | RIKEN cDNA C030034I22 gene                                                                                       | 2.4                 | 4.14                  | 1                   | 1.44                  |
| <i>H2-T23</i>       | histocompatibility 2, T region locus 23                                                                          | 3.76                | 6.4                   | 1                   | 1.45                  |

Shown are relative expression levels in Pkd1<sup>+/+</sup> MEK cells or Pkd1<sup>-/-</sup> MEK cells with or without flow (F) stimulation.
