# Supplementary material
Source: PubMed Central journal article supplement (PMC2835323)
Supplement: supp_dev.049437_DEV049437TableS2.pdf [file supp_dev.049437_DEV049437TableS2.pdf]

**Table S2. Quantification of genotypes observed from 89 viable E18.5 embryos from 11 crosses of *Pkd2*<sup>+/-</sup> *Hdac5*<sup>+/-</sup> male and female mice**

| <i>Pkd2 Hdac5</i>  | -/- -/- | -/- +/- | -/- +/+ | +/- -/- | +/- +/- | +/- +/+ | +/+ -/- | +/+ +/- | +/+ +/+ |
|--------------------|---------|---------|---------|---------|---------|---------|---------|---------|---------|
| Observed frequency | 1.1%    | 4.5%    | 0%      | 13.5%   | 29.2%   | 9.0%    | 18.0%   | 22.5%   | 2.2%    |
| Expected frequency | 6.25%   | 12.5%   | 6.25%   | 12.5%   | 25%     | 12.5%   | 6.25%   | 12.5%   | 6.25%   |
