# Supplementary material
Source: PubMed Central journal article supplement (PMC2835323)

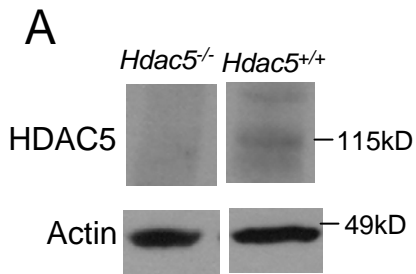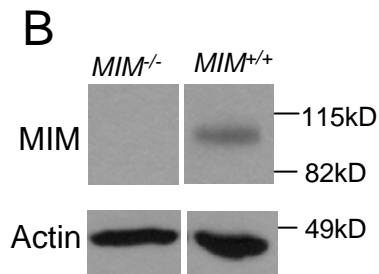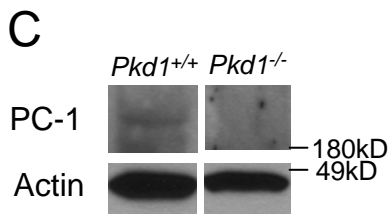

Supplement: supp_dev.049437_049437FigS1.pdf [file supp_dev.049437_049437FigS1.pdf]

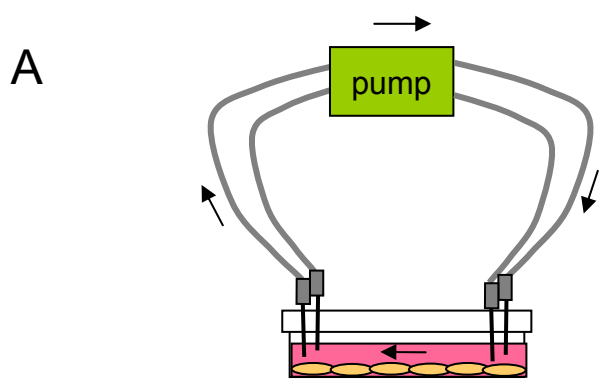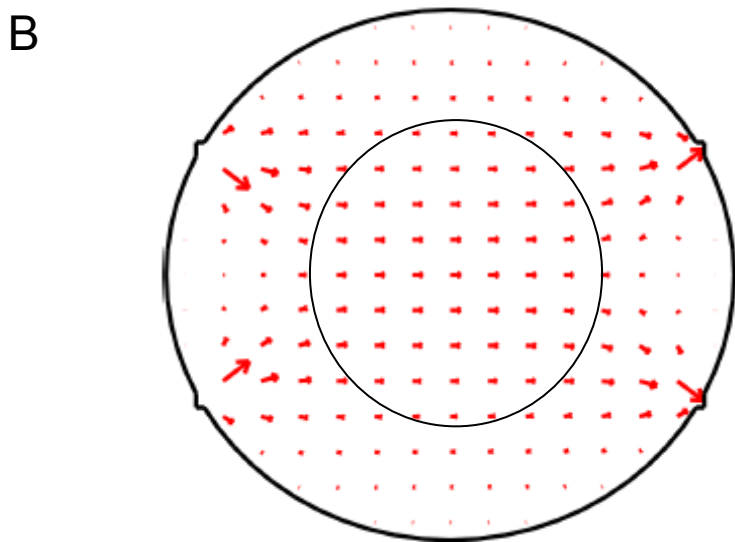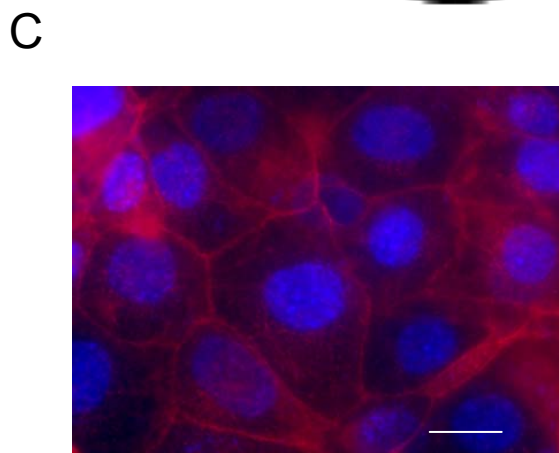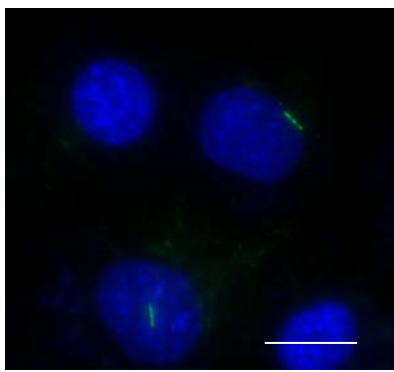

Supplement: supp_dev.049437_049437FigS2.pdf [file supp_dev.049437_049437FigS2.pdf]

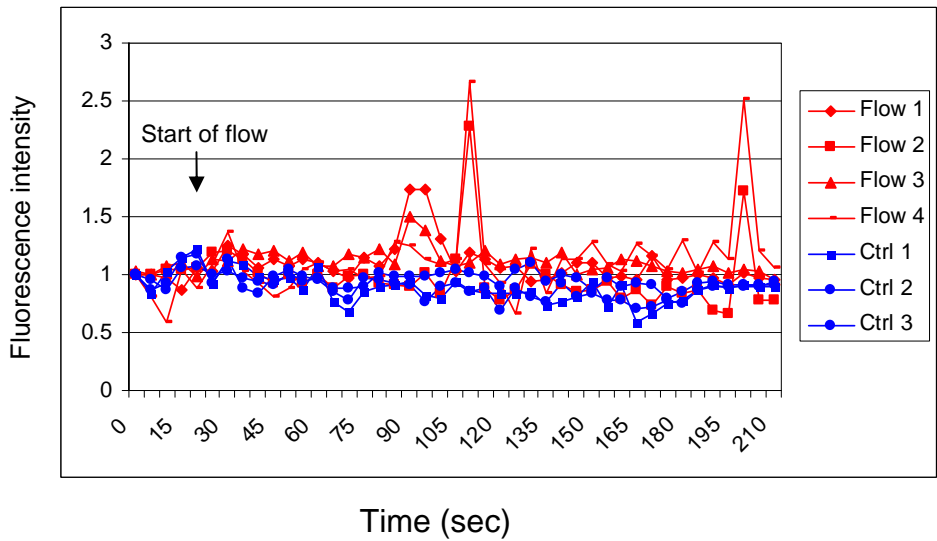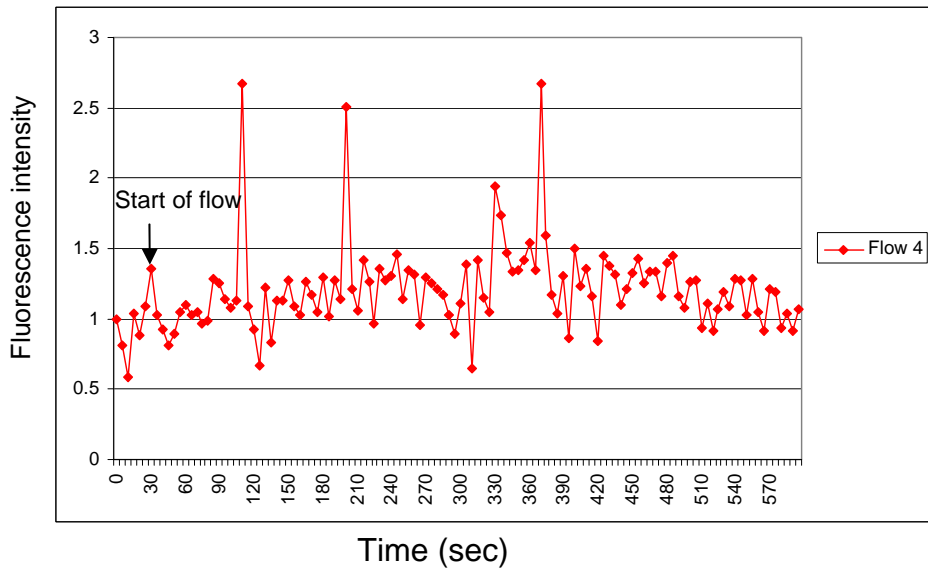

Supplement: supp_dev.049437_049437FigS3.pdf [file supp_dev.049437_049437FigS3.pdf]

**A**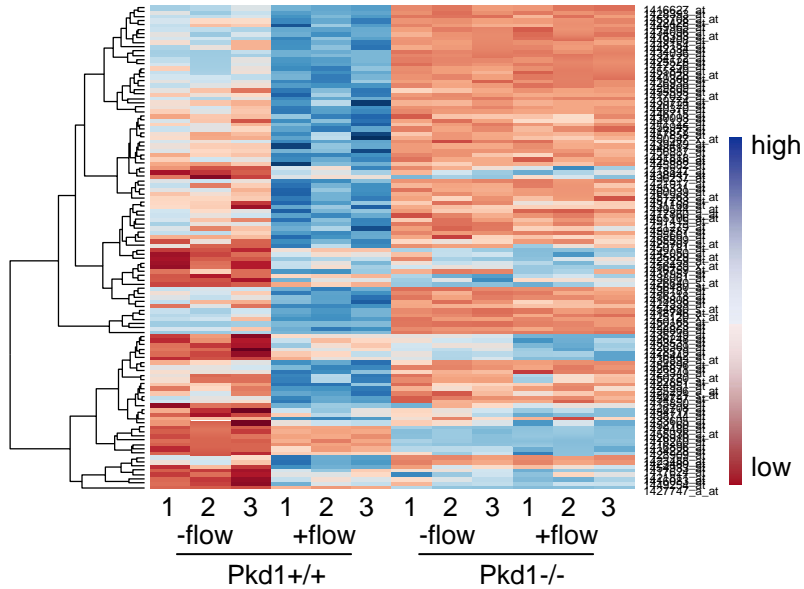**B**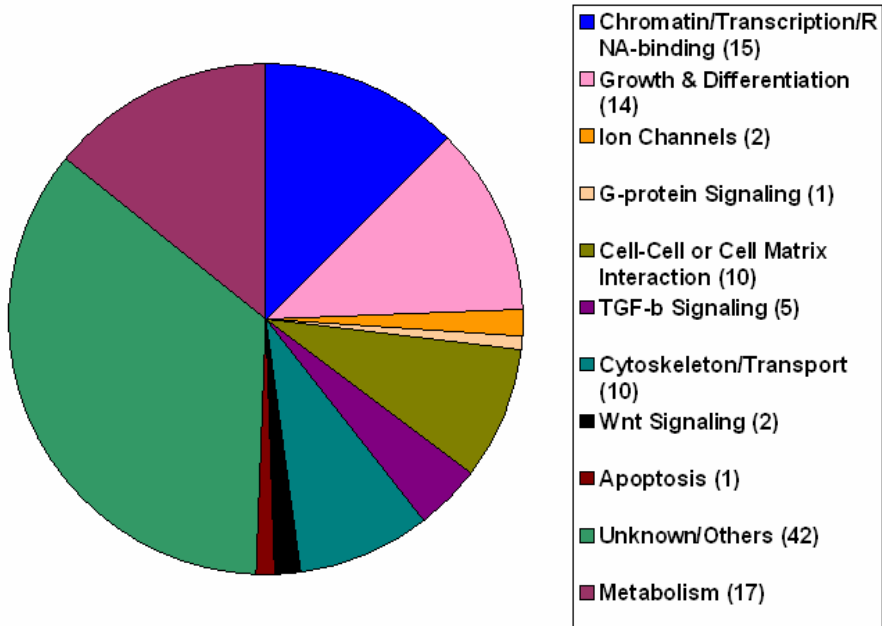

Supplement: supp_dev.049437_049437FigS4.pdf [file supp_dev.049437_049437FigS4.pdf]

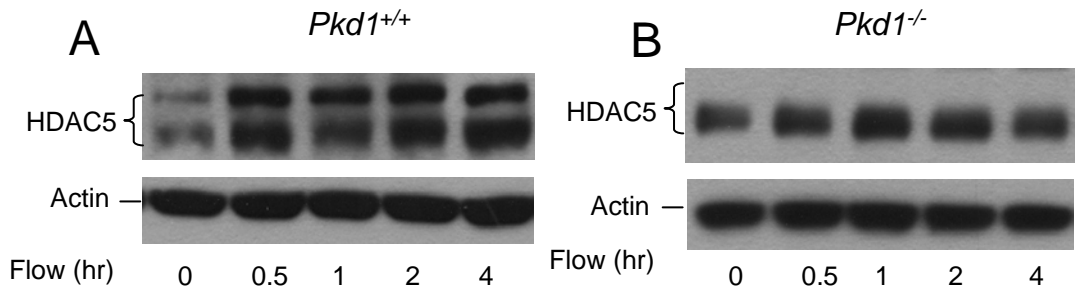

**C**

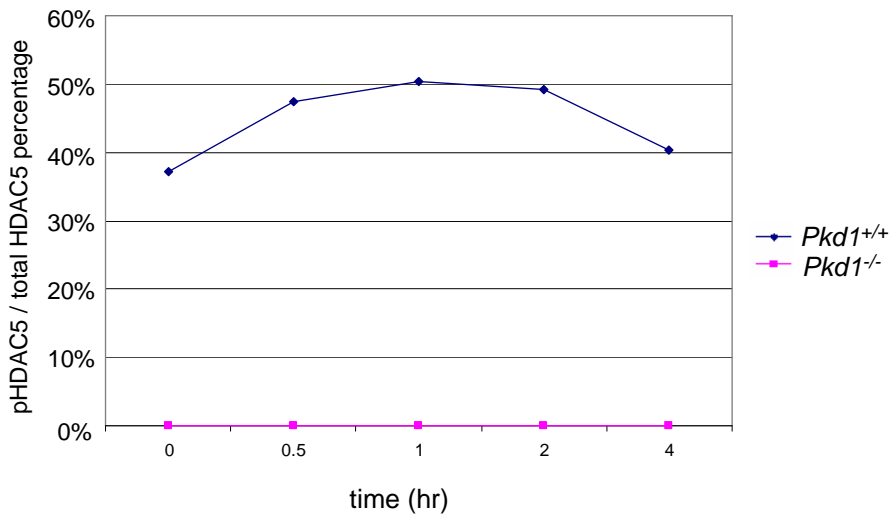

Supplement: supp_dev.049437_049437FigS5.pdf [file supp_dev.049437_049437FigS5.pdf]

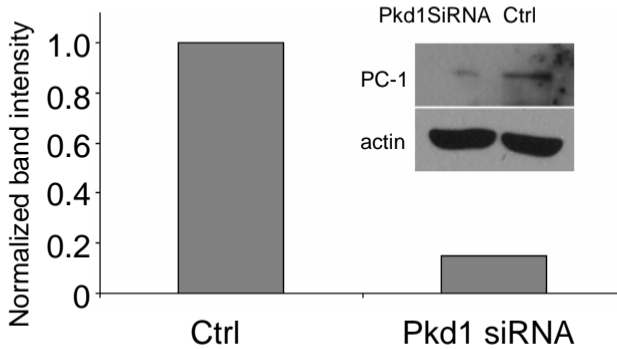

Supplement: supp_dev.049437_049437FigS6.pdf [file supp_dev.049437_049437FigS6.pdf]

**A**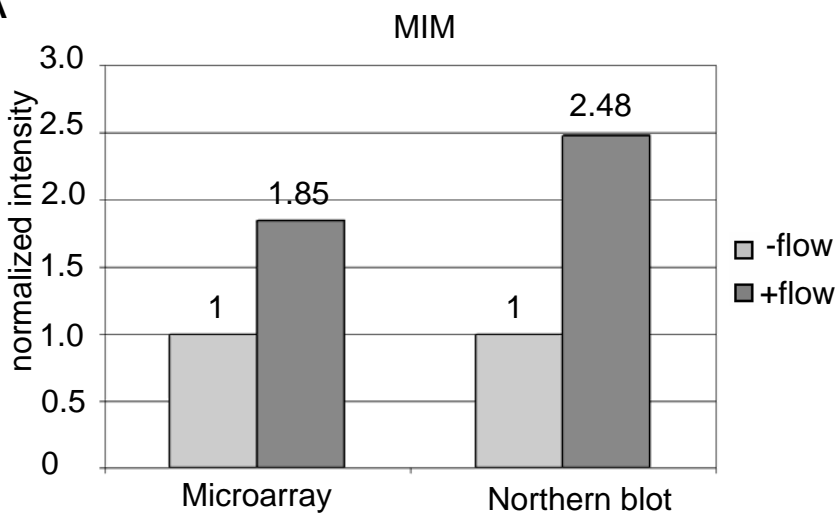**B**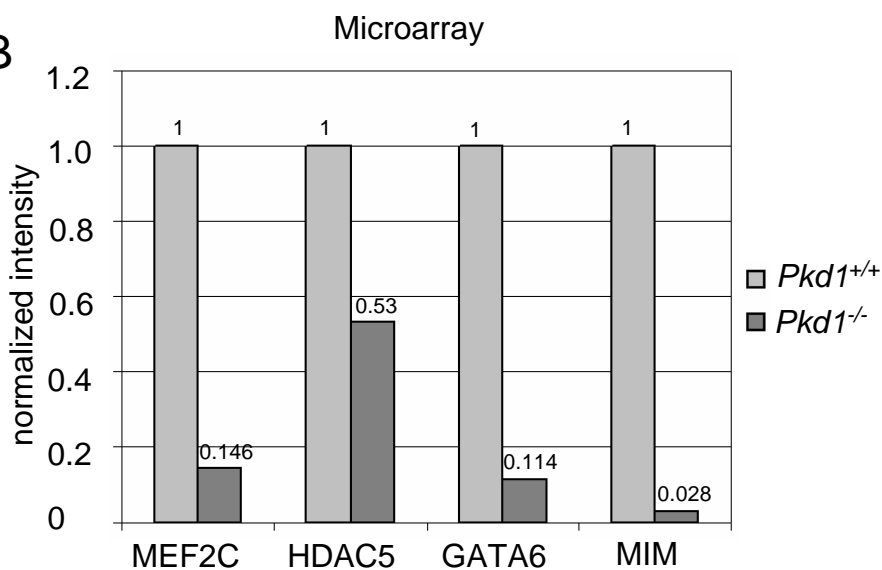**C**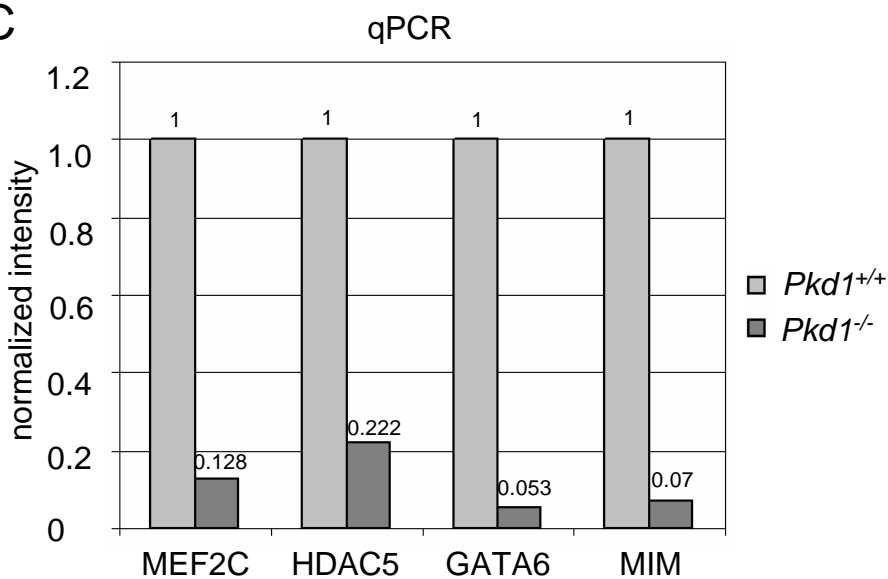

Supplement: supp_dev.049437_049437FigS7.pdf [file supp_dev.049437_049437FigS7.pdf]

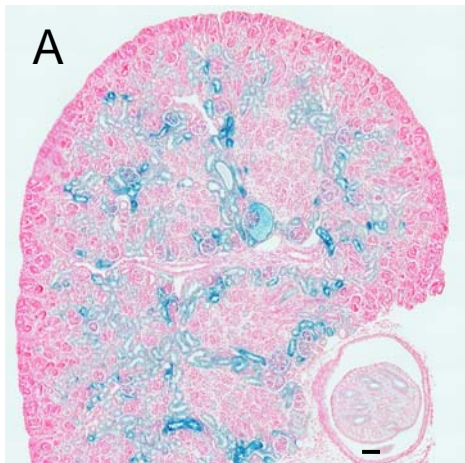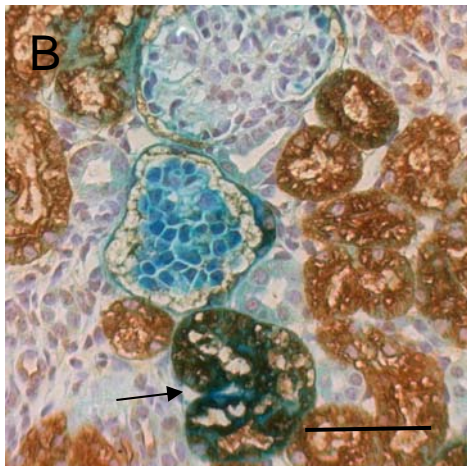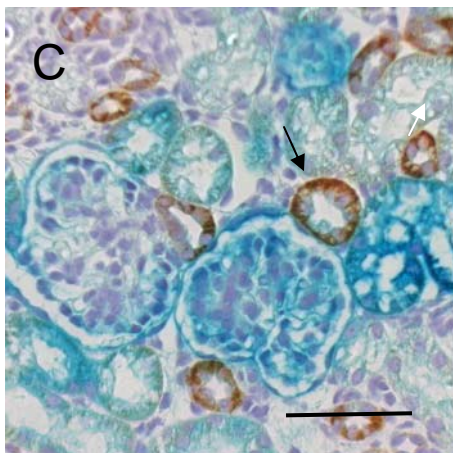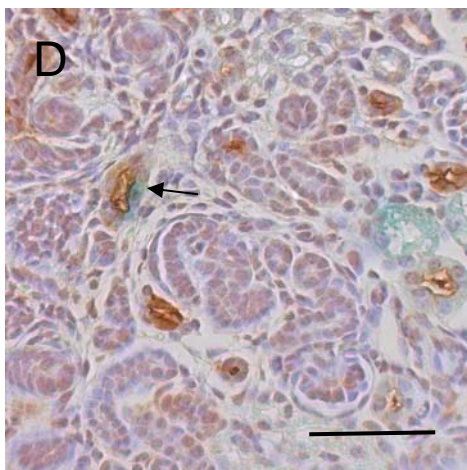

Supplement: supp_dev.049437_049437FigS8.pdf [file supp_dev.049437_049437FigS8.pdf]

**A**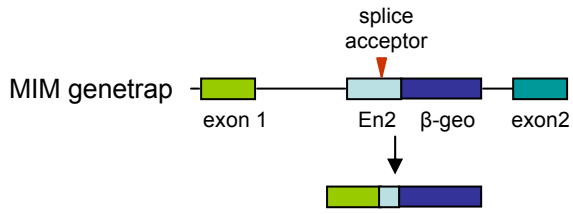**B**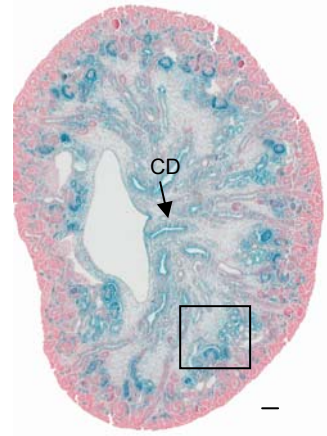**D**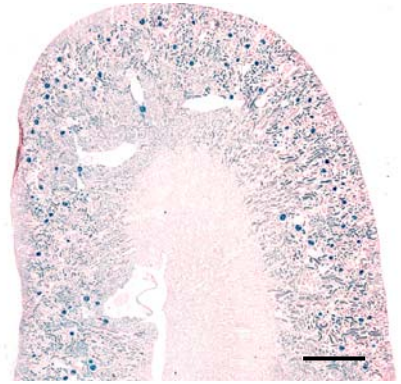**C**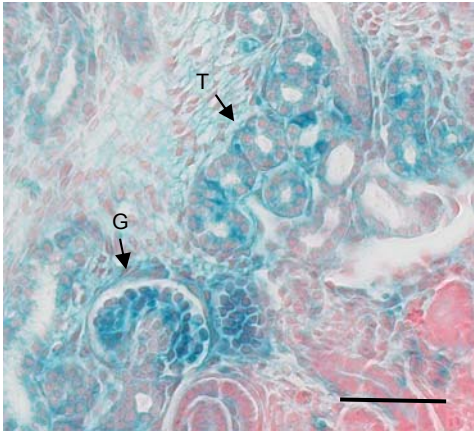**E***MIM*<sup>+/-</sup>*MIM*<sup>+/+</sup>

Cortex

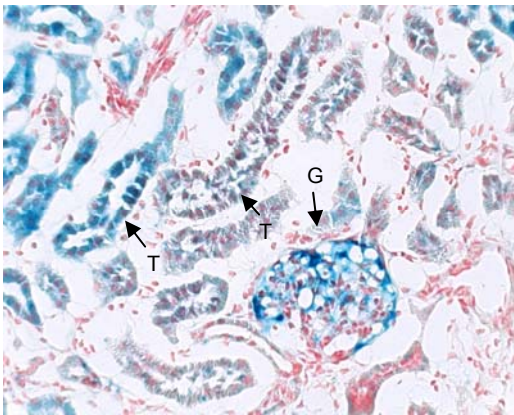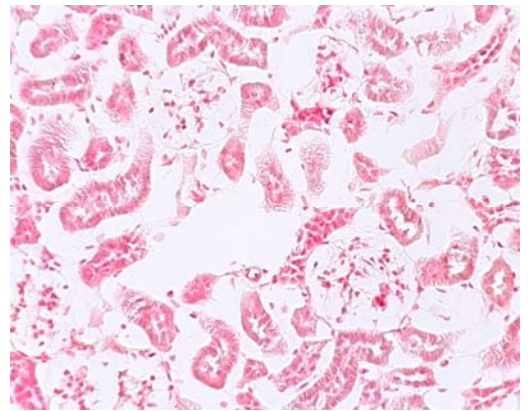

Medulla

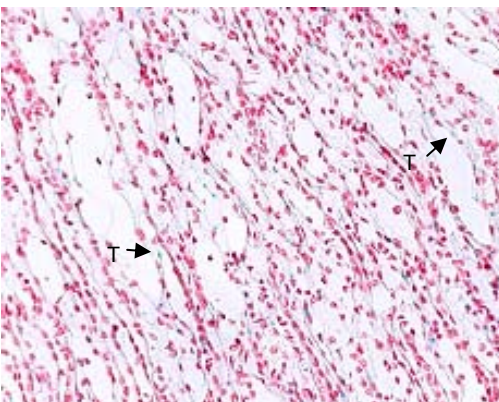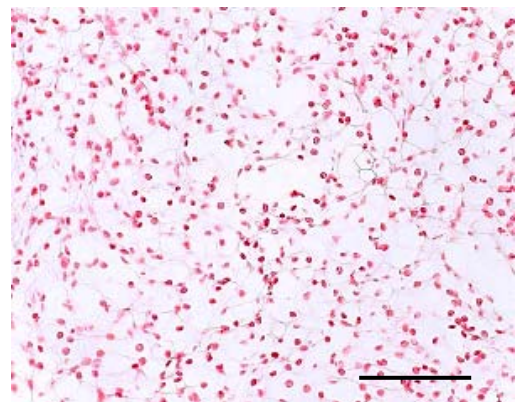

Supplement: supp_dev.049437_049437FigS9.pdf [file supp_dev.049437_049437FigS9.pdf]
